# Supplementary material for: Understanding the role of electrons in the magnetism of a colossal permittivity dielectric material
Source: Royal Society of Chemistry journal article supplement (doi:10.1039/c9mh00983c), 2019-08-21
Supplement: c9mh00983c1.pdf [file c9mh00983c1.pdf]

## Supplementary Information

### Understanding the role of electrons in the magnetism within a colossal permittivity dielectric material

Adam Berlie, Ian Terry, Stephen Cottrell, Wanbiao Hu and Yun Liu

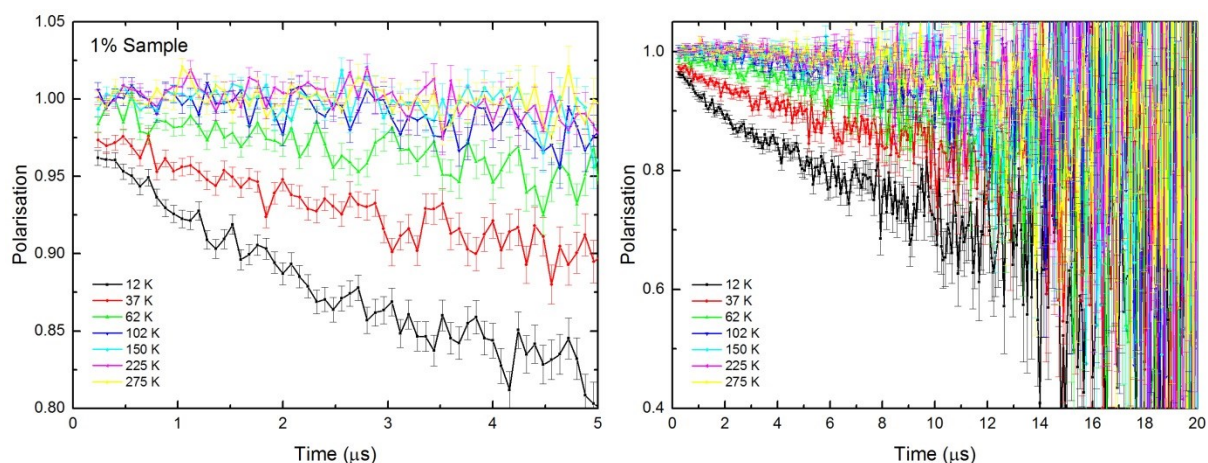

Figure 1: Muon spectra for the 1% sample at different temperatures. The left hand graph is a close up of the full spectra between 0 and 5  $\mu$ s.

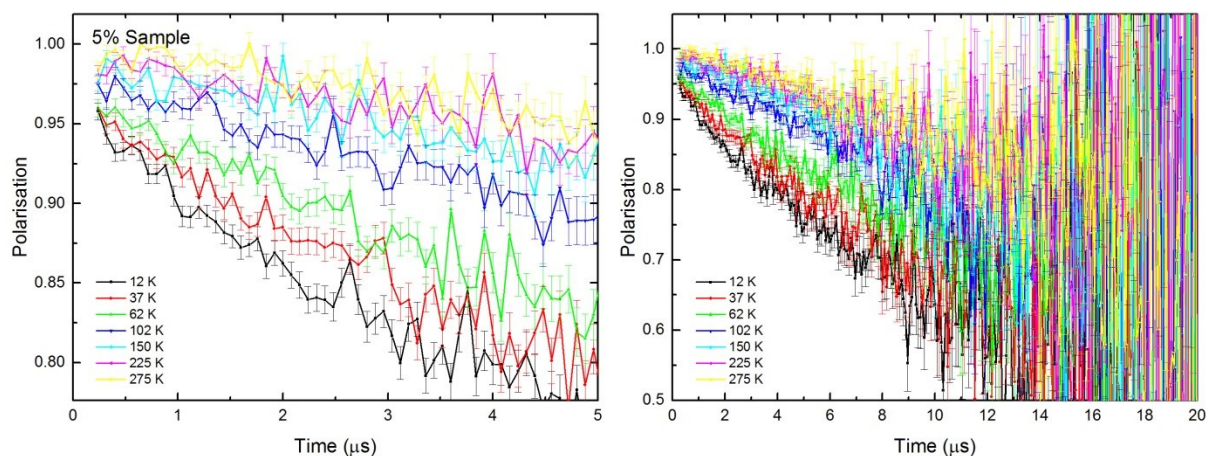

Figure 2: Muon spectra for the 5% sample at different temperatures. The left hand graph is a close up of the full spectra between 0 and 5  $\mu$ s.

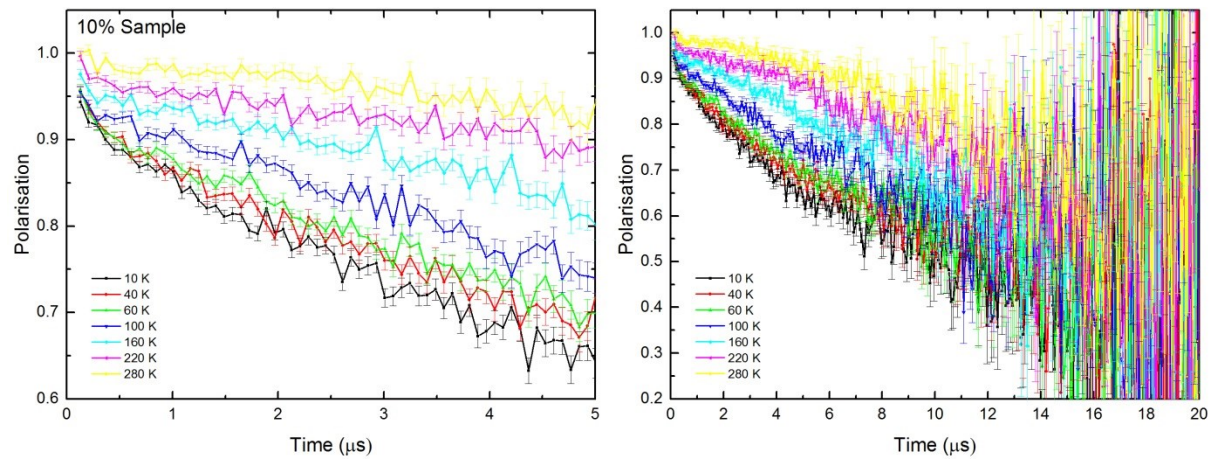

Figure 3: Muon spectra for the 10% sample at different temperatures. The left hand graph is a close up of the full spectra between 0 and 5  $\mu\text{s}$ .
